1  
2  
3  
4  
5  
6  
7  
8  
9  
10  
11  
12  
13  
14  
15  
16  
17  
18  
19  
20  
21  
22  
23  
24  
25

## **Emergence and Enhancement of Ultrasensitivity through Posttranslational Modulation of Protein Stability**

Carla M. Kumbale<sup>1</sup>, Eberhard O. Voit<sup>1\*</sup>, and Qiang Zhang<sup>2\*</sup>

<sup>1</sup>Department of Biomedical Engineering, Georgia Institute of Technology and Emory University,  
950 Atlantic Drive, Atlanta, GA 30332

<sup>2</sup>Gangarosa Department of Environmental Health, Rollins School of Public Health, Emory  
University,  
1518 Clifton Rd, NE, Atlanta, GA 30322

\*co-corresponding authors

### **Email addresses:**

[ckumbale3@gatech.edu](mailto:ckumbale3@gatech.edu)

[eberhard.voit@bme.gatech.edu](mailto:eberhard.voit@bme.gatech.edu)

[qiang.zhang@emory.edu](mailto:qiang.zhang@emory.edu)

26

## Abstract

27 Signal amplification converts a linear input to a steeply sigmoid output and is central to cellular  
28 functions. One canonical signal amplifying motif is zero-order ultrasensitivity through the  
29 posttranslational modification (PTM) cycle signaling proteins. The functionality of this signaling  
30 motif has been examined conventionally by supposing that the total amount of the protein  
31 substrates remains constant. However, covalent modification of signaling proteins often results  
32 in changes in their stability, which affects the abundance of the protein substrates. Here we use  
33 a mathematical model to explore the signal amplification properties in such scenarios. Our  
34 simulations indicate that PTM-induced protein stabilization brings the enzymes closer to  
35 saturation, and as a result, ultrasensitivity may emerge or is greatly enhanced, with a steeper  
36 sigmoidal response of higher magnitude and generally longer response time. In cases where  
37 PTM destabilizes the protein, ultrasensitivity can be regained through changes in the activities  
38 of the involved enzymes or from increased protein synthesis. Interestingly, ultrasensitivity is not  
39 limited to modified or unmodified protein substrates; the total protein substrate can also exhibit  
40 ultrasensitivity. It is conceivable that cells use inducible protein stabilization as a way to boost  
41 signal amplification while saving energy by keeping the protein substrate at low basal  
42 conditions.

43

44 **Key words:** Ultrasensitivity, posttranslational modification, covalent modification cycle,  
45 protein stability, signal amplification

46

47

## Introduction

### 48 ***Regulation of protein stability through posttranslational modifications***

49 It has been known for some while that posttranslational modifications (PTMs) are important  
50 mechanisms for regulating not only the activity of a protein, but also the abundance of a protein  
51 by means of changing its stability. A well-studied example is the DNA damage response. Once  
52 the tumor suppressor p53 is phosphorylated by upstream kinases, such as ATM (ataxia  
53 telangiectasia mutated), in response to DNA double-strand breaks, its half-life increases  
54 dramatically from less than 30 minutes to over 3 hours (Fig. 1A), which causes the accumulation  
55 of p53 that can induce target gene expression [1, 2]. A second example, in some sense of the  
56 opposite nature, occurs in the germinal center response of B lymphocytes. B cell receptor-  
57 activated MAPK phosphorylates BCL6 (B-cell lymphoma 6), resulting in accelerated degradation  
58 of BCL6 by the ubiquitin/proteasome pathway (Fig. 1B), which helps the B cells exit the  
59 germinal center response [3]. Many similar examples have been reported where protein  
60 stabilization or destabilization drives signaling, including IKK-mediated phosphorylation and  
61 degradation of I $\kappa$ B in the inflammatory response, Chk1-mediated phosphorylation and  
62 proteasomal degradation of Cdc25A during cell cycle arrest, and stabilization of  $\Delta$ FosB by  
63 casein kinase 2-mediated phosphorylation, which might be responsible for long-term adaptation  
64 in the brain [4-6]. It is thus conceivable—and even likely—that altering protein stability and/or  
65 activity through the same PTM event may be an important, controllable mode of dual regulation  
66 of cellular signaling in general. Expressed differently, if the abundance of a protein substrate  
67 can be fine-tuned through changes in protein stability, then these changes can in turn be used  
68 by the cell as modulators of both the dynamic and steady-state input-output (I/O) behaviors of  
69 covalent modification cycles (CMCs), which may or may not alter the activity of the protein.

70

### 71 ***Ultrasensitivity***

72 Cell signaling networks display “ultrasensitivity” if small changes in input are amplified into much

73 larger percentage changes in output [7, 8]. An ultrasensitive I/O relationship is generally  
74 sigmoidal in shape and often approximated by a Hill function; the terminology suggests that an  
75 ultrasensitive response is steeper than the well-known hyperbolic trend of a Michaelis-Menten  
76 function [9, 10]. Embedded in complex network structures such as feedback and feedforward  
77 loops, signal amplification is required for cells and organisms to achieve higher-order functions,  
78 including differentiation, proliferation, homeostasis, adaptation, and biological rhythms [11, 12].  
79 At least six major ultrasensitive response motifs (URM) have been identified in intracellular  
80 molecular networks, namely: (i) positive cooperative binding, (ii) homo-multimerization, (iii)  
81 multistep signaling, (iv) molecular titration, (v) zero-order CMCs, and (vi) positive feedback [12-  
82 14]. Each of these URMs has its own unique mechanism achieving signal amplification.

83

#### 84 ***Ultrasensitivity through zero-order covalent modification cycle***

85 The ubiquitous zero-order CMC is particularly interesting, as it can generate nearly switch-like  
86 responses. A typical implementation is a modifying / demodifying cycle that is driven by PTMs  
87 involving phosphorylation, acetylation, oxidation, methylation, or sumoylation [15]. Specifically,  
88 protein activities can be regulated through covalent bonding of moieties to certain amino acid  
89 residues, such as phosphate to serine, threonine, and tyrosine in the case of phosphorylation,  
90 and an acetyl group to lysine in the case of acetylation. The local electrical charge, possibly  
91 accompanied by steric changes introduced by these moieties, can greatly affect the protein  
92 molecule's interaction with other large or small molecules, thereby turning on or off the activity  
93 of the protein as an enzyme, transcription factor, or signaling molecule. Covalent modifications  
94 of proteins often require specific enzymes, such as kinases, acetyltransferases,  
95 methyltransferases, and oxidases, as well as counteracting (demodification) enzymes catalyzing  
96 the reverse reactions, such as phosphatases, deacetylases, demethylases, and reductases.

97

98 Signal amplification through CMCs was first predicted and analyzed with a mathematical

99 model by Goldbeter and Koshland Jr. in the early 1980s [16, 17]. It occurs when the two  
100 opposing enzymes driving the modification cycle of a protein are operating near saturation. In a  
101 phosphorylation-dephosphorylation cycle, for example, zero-order ultrasensitivity arises when  
102 the amount of protein substrate is at a concentration high enough to saturate the available  
103 kinase and phosphatase. Here the terminology “protein substrate” is used to distinguish this  
104 protein from the involved enzymes. Under these conditions, small changes in the amount or  
105 activity of either the kinase or phosphatase can dramatically change the steady-state fraction of  
106 the amounts of phosphorylated or dephosphorylated substrates. Since the theoretical  
107 predictions by the Goldbeter-Koshland model, zero-order ultrasensitivity via covalent  
108 modification has been reported in numerous biological settings, in both prokaryotes and  
109 eukaryotes [18-23].

110

### 111 ***Caveat of the Goldbeter-Koshland model suggests a mechanism of signaling control***

112 One important conceptual simplification of the original Goldbeter-Koshland model is that the  
113 total abundance of the protein substrate in the CMC is regarded as constant, which ignores  
114 turnover via *de novo* protein synthesis and degradation. This omission is possibly critical in the  
115 context of protein signaling, as proteins are constantly synthesized and degraded. The  
116 assumption of constancy may largely be valid when the signaling events driven by PTM occur  
117 rapidly in comparison to the protein substrate turnover. However, even if signaling is fast, it is  
118 possible—and indeed a frequent observation as mentioned before—that the PTM alters the  
119 stability of the protein substrate, which secondarily affects the total amount of the protein  
120 substrate. We first reported that, due to the “leakiness” caused by protein turnover, zero-order  
121 ultrasensitivity is compromised when turnover is present, and that the steepness of the  
122 sigmoidal response deteriorates as the overall protein turnover rate increases [24]. More  
123 recently, Mallela *et al.* further elaborated on the importance of protein synthesis and turnover in  
124 affecting zero-order ultrasensitivity of CMCs, especially in the context of multiple PTM cascades

125 sharing the same E3 ligase responsible for protein degradation [25]. Thus, the formerly simple  
126 results described by Goldbeter and Koshland are in truth more complicated, as they depend on  
127 the kinetic features of the involved enzymes, their saturation, and the degree of protein  
128 synthesis and turnover.

129

130 Here we pursue the question how cells may use alternate PTM-induced changes in  
131 protein stability as an additional layer of control to modulate the zero-order ultrasensitive  
132 response of a CMC. In particular, we ask whether such modulations are sufficient to render or  
133 enhance ultrasensitivity by stabilizing the protein substrate, or diminish or destroy it by  
134 destabilizing the protein substrate. To answer these questions, we systematically study the  
135 governing kinetic features of the protein cycle one by one, with mathematical modeling, which  
136 allows us to modify any aspect or combination of aspects of a protein signaling cycle with full  
137 knowledge of the system features and behaviors. We demonstrate that ultrasensitivity can be  
138 gained, enhanced or attenuated for the modified, unmodified, and total protein substrates  
139 depending on the conditions of stability changes.

140

141

## Methods

### 142 ***Model structure and parameterization***

143 Our goal is to explore how the behavior of a CMC is affected if protein turnover, protein stability,  
144 and kinetic features of the governing enzymes are explicitly taken into account. For this  
145 exploration, we consider the generic signaling motif of a protein phosphorylation-  
146 dephosphorylation cycle (Fig. 1C) as an “order-of-magnitude” model, *i.e.*, a numerical model  
147 without absolutely precise determination of parameter values and with an expectation of  
148 qualitative, rather than quantitative results.

149

150 The model consists of two ordinary differential equations (ODEs), formulated in the  
151 tradition of mass action and Michaelis-Menten (MM) kinetics:

152

$$153 \quad \frac{dR}{dt} = k_0 - k_1 \frac{X R}{(K_{m1} + R)} + k_2 \frac{Y R_p}{(K_{m2} + R_p)} - k_3 R, \quad (1)$$

$$154 \quad \frac{dR_p}{dt} = k_1 \frac{X R}{(K_{m1} + R)} - k_2 \frac{Y R_p}{(K_{m2} + R_p)} - k_4 R_p. \quad (2)$$

155

156  $R$  is the protein substrate that is newly synthesized with rate  $k_0$ . It can either be phosphorylated  
157 into  $R_p$  by a kinase  $X$  which, as a default, follows typical MM kinetics with Michaelis constant  $K_{m1}$   
158 and maximal velocity  $V_{max1} = k_1 X$ , or it can be degraded with a first-order rate constant  $k_3$ .  
159 Analogously,  $R_p$  can be dephosphorylated by a phosphatase  $Y$  (not shown in Fig. 1C) that  
160 follows MM kinetics with a Michaelis constant  $K_{m2}$  and maximal velocity  $V_{max2} = k_2 Y$ .  $R_p$  can also  
161 be degraded, in this case with a first-order rate constant  $k_4$ .

162

163 Default parameter values are presented in Table 1. Since covalent protein modifications  
164 such as phosphorylation and dephosphorylation occur rapidly, at the order of seconds to  
165 minutes, while protein degradation occurs at a much slower rate, often with half-lives at the

166 order of hours, the time scales between these two types of processes are clearly separated by  
 167 two or more orders of magnitude. Specifically, we set default values for  $k_3$  and  $k_4$  to be 1/100 of  
 168  $k_1/K_{m1}$  and  $k_2/K_{m2}$ , respectively, because these two ratios approximate the first-order time  
 169 constants at which phosphorylation and dephosphorylation occur when the kinase and  
 170 phosphatase are far from saturation. Unless otherwise specified,  $Y$  is kept as a constant with  
 171 value 1.

**Table 1. Default model parameters**

| Parameter | Description                                   | Default Value           |
|-----------|-----------------------------------------------|-------------------------|
| $k_0$     | Rate constant of synthesis of $R$             | 1 (concentration/time)  |
| $k_1$     | Catalytic rate constant for phosphorylation   | 10 (1/time)             |
| $K_{m1}$  | Michaelis constant for phosphorylation        | 10 (concentration)      |
| $X$       | Kinase                                        | 1 (concentration)       |
| $k_2$     | Catalytic rate constant for dephosphorylation | 10 (concentration/time) |
| $K_{m2}$  | Michaelis constant for dephosphorylation      | 10 (concentration)      |
| $k_3$     | Degradation rate constant of $R$              | 0.01 (1/time)           |
| $k_4$     | Degradation rate constant of $R_p$            | 0.01 (1/time)           |
| $Y$       | Phosphatase                                   | 1 (concentration)       |

172  
 173 **Metrics of ultrasensitivity**  
 174 In the present study, all dose-response (DR) curves are obtained once the model has achieved  
 175 steady state. The degree of ultrasensitivity of a steady-state DR curve can be evaluated with  
 176 two related metrics. First, the Hill coefficient,  $n_H$ , may be approximated from the equation

$$177 \quad n_H = \frac{\ln 81}{\frac{\ln X_{0.9}}{\ln X_{0.1}}}, \quad (3)$$

178 where  $X_{0.9}$  and  $X_{0.1}$  are the concentrations of  $X$  that produce 90% and 10% respectively of the  
 179 maximal response (after subtracting the background response level when  $X=0$ ) [12].  $n_H$   
 180 represents the overall steepness or global degree of ultrasensitivity of the DR curve. Second,  
 181 we evaluate the local response coefficient ( $LRC$ ) of a DR curve by calculating all slopes of the  
 182 curve on dual-log scales, which are equivalent to the ratios of the fractional change in response  
 183 ( $R$ ) to the fractional change in dose ( $D$ ) [7]:

$$184 \quad LRC = \frac{d \ln R}{d \ln D}. \quad (4)$$

185 The maximal  $|LRC|$  of a DR curve ( $|LRC|_{max}$ ) represents the maximal amplification capacity of



186 the signaling motif. Typical ultrasensitive responses have  $|LRC|_{max}$  values substantially above 1;  
187 for values below 1, ultrasensitivity is lost. The comparison between  $n_H$  and  $LRC$  is important as  
188 these quantities are not necessarily equivalent and depend on the basal response level and the  
189 shape of the DR curve; thus,  $n_H$  alone can misrepresent the actual degree of signal amplification  
190 [12, 26, 27].

191

### 192 ***Simulation tools***

193 The model was coded and simulated in MatLab R2019a (MathWorks, Natick, Massachusetts),  
194 which is available as Supplemental Files. All simulations were run using differential equation  
195 solver ode23s.

196

197

## Results

### 198 **1. Ultrasensitivity in the absence of PTM-induced changes in protein stability**

199 To create a baseline, we start with the default setting  $k_3=k_4=0.01$ , which reflects that the  
200 phosphorylation status of  $R$  does not affect its stability. As a consequence, the total steady-state  
201 protein substrate concentration  $R_{tot}(=R+R_p)$  remains constant even if the activity of the kinase  $X$   
202 varies. Also, the  $k_3$  and  $k_4$  values are very small in comparison to  $k_1$  and  $k_2$ . Since  $R_{tot}$  typically  
203 exceeds  $K_{m1}$  and  $K_{m2}$  by 10-fold or more, and as expected for the CMC motif, the steady-state  
204 DR curves of  $R$  vs.  $X$  and  $R_p$  vs.  $X$  are sigmoidal on the linear scale (Fig. 2A) with  $n_H$  at -3.51  
205 and 3.51, respectively (Fig. 2D); the negative sign for  $R$  indicates a decreasing or inhibitory  
206 response. On a log scale, the quasi-exponential rise in  $R_p$  and decay of  $R$  flatten toward straight  
207 lines (Fig. 2C).

208

209 The degree of local ultrasensitivity, as measured by  $LRC$ , varies across the range of  $X$   
210 and peaks in the center of the DR curves at about -3.0 and 3.1 for  $R$  and  $R_p$ , respectively (Fig.  
211 2D). Thus,  $|n_H|$  in this case is an overestimate of the corresponding  $|LRC|_{max}$ . The  
212 Phosphorylation and dephosphorylation fluxes (with rates  $k_1$  and  $k_2$ , respectively) are dominant  
213 over the relatively small protein turnover fluxes with rates  $k_3$  and  $k_4$  at the steady state for large  
214 input values of  $X$  (Fig. 2B). In a logarithmic representation, these MM fluxes increase essentially  
215 linearly as  $X$  increases before approaching plateaus (Fig. 2B). When protein production and  
216 degradation are considered negligible, by setting  $k_0$ ,  $k_3$  and  $k_4$  to zero, the ultrasensitive  
217 responses are slightly enhanced, and the Hill coefficients and  $(|LRC|_{max})$  rise in magnitude to  
218 3.74 and 3.45 for  $R_p$  and -3.74 and -3.34 for  $R$  (simulation results not shown).

219

### 220 **2. Effects of protein stability on ultrasensitivity**

221 In this section, we suppose that changes in the stability of  $R_p$  can be introduced by the PTM,  
222 and thus by means of the kinase  $X$ , as it has been observed numerous times [1, 3-6]. Thus,

223 when the protein substrate  $R$  is phosphorylated into  $R_p$ , the stability of  $R_p$  is affected, which  
224 translates into an increasing or decreasing rate of degradation,  $k_4$ . In particular, if the PTM  
225 stabilizes  $R_p$ , *i.e.*,  $k_4$  decreases, the amount of  $R_p$  increases, and  $R_{tot}$  is expected to increase  
226 accordingly. This rise in  $R_{tot}$  secondarily alters the degree of saturation of the phosphorylation  
227 and dephosphorylation reactions and, consequently, is expected to affect the degree of  
228 ultrasensitivity in the DR curves. These overall effects could theoretically also be caused by  
229 changes in  $k_3$ , but we focus on  $k_4$  because the PTM directly affects the stability of  $R_p$ , whereas  $R$   
230 is affected only in a secondary manner.

231

### 232 **2.1 Effects on steady-state $R$**

233 When the PTM increases the stability of  $R_p$ , *i.e.*,  $k_4$  decreases, the steady-state DR curves of  $R$   
234 vs.  $X$  (Fig. 3A) and  $R_p$  vs.  $X$  (Fig. 3B) both become steeper; conversely, when the stability of  $R_p$   
235 decreases, *i.e.*,  $k_4$  increases, the two curves become shallower. The changes in the steepness  
236 of the DR curves can be quantified by  $n_H$  and also with the maximal local ultrasensitivity,  
237  $|LRC|_{max}$ . Both increase as  $k_4$  decreases (Fig. 3D and 3E). Interestingly, however, for  $k_4$  values  
238 comparable to or below the default value,  $|LRC|_{max}$  is generally lower than  $|n_H|$  for the  $R$  vs.  $X$   
239 response, which is an indication that the Hill coefficient overestimates the maximal degree of  
240 signal amplification in these situations (Fig. 3D). For  $k_4$  values rising above the default value,  
241  $|LRC|_{max}$  starts to match up with  $|n_H|$  and eventually even exceeds it. For very large  $k_4$  values,  
242  $|n_H|$  approaches a constant value of about 1.58 and  $|LRC|_{max}$  approaches a constant value of  
243 about 1.72. Thus, there is still ultrasensitivity, but its degree is modest. The value of the kinase  
244 activity  $X$  at which  $|LRC|$  is maximal shifts to the left as  $k_4$  increases.

245

### 246 **2.2 Effects on steady-state $R_p$**

247 The elevated steepness of the  $R_p$  vs.  $X$  response, with increased stability of  $R_p$ , is evidently due  
248 to the increasing maximal  $R_p$  level when  $k_4$  decreases (Fig. 3B). Interestingly, and contrary to

249 the effect on the response of  $R$  vs.  $X$ ,  $LRC_{max}$  is generally higher than  $n_H$  for  $k_4$  values below the  
250 default value, indicating that the Hill coefficient is underestimating the maximal degree of signal  
251 amplification (Fig. 3E). For  $k_4$  values higher than the default value,  $LRC_{max}$  starts to match  $n_H$   
252 and eventually drops below its value. For very large  $k_4$  values,  $n_H$  approaches 1.58, whereas  
253  $LRC_{max}$  settles at about 1. The value of kinase activity  $X$  for which  $LRC$  is maximal shifts to the  
254 left as  $k_4$  increases.

255

### 256 **2.3 Effects on steady-state $R_{tot}$**

257 In the Goldbeter-Koshland model of the CMC, either  $R$  or  $R_p$  is regarded as the output, because  
258 the activities of either one may change by the phosphorylation status. However, in some  
259 situations, the covalent modification status of an amino acid residue may only affect protein  
260 stability without affecting protein activity [28, 29]. In these cases,  $R_{tot}$  should be viewed as the  
261 output. Depending on the values of  $k_4$ , the response of  $R_{tot}$  vs.  $X$  can be either stimulatory or  
262 inhibitory (Fig. 3C), because either more or less  $R_p$  is removed from the system. At the default  
263 level of  $k_4$ , which is equal to  $k_3$ ,  $R_{tot}$  does not change with  $X$ . However, as the PTM stabilizes  $R_p$ ,  
264 *i.e.*,  $k_4$  decreases from the default value, the steady-state response of  $R_{tot}$  vs.  $X$  increases  
265 monotonically to a higher plateau than before and also becomes increasingly steeper, with  
266  $LRC_{max}$  surpassing  $n_H$  for very low  $k_4$  values (Fig. 3F). Conversely, as the PTM destabilizes  $R_p$ ,  
267 the steady-state response of  $R_{tot}$  vs.  $X$  decreases monotonically toward a lower plateau and also  
268 becomes increasingly more sigmoidal (despite that the response of  $R_p$  itself is no longer  
269 ultrasensitive), with  $|LRC|_{max}$  approaching 1.72 for very high  $k_4$  values. Surprisingly,  $|n_H|$  changes  
270 in the opposite direction to  $|LRC|_{max}$  for  $k_4$  values above the default value (Fig. 3F). A small  
271 increase in  $k_4$  above the default value first results in a very high  $|n_H|$ , but as  $k_4$  increases further,  
272  $|n_H|$  drops back and approaches 1.58. This inverse relationship between  $|LRC|_{max}$  and  $|n_H|$   
273 demonstrates again that these two metrics do not always conform to each other and that  
274 reliance on the Hill coefficient as an estimate of the degree of signal amplification can be

275 misleading. In summary, both stabilization and destabilization of  $R_p$  can lead to the  
276 enhancement of ultrasensitivity in the steady-state response curve of  $R_{tot}$  vs.  $X$ .

277

278 While  $R_p$  and  $R$  are expected to exhibit ultrasensitivity due to the zero-order covalent  
279 modification effect, as revealed by the Goldbeter-Koshland model, it is interesting to note that  
280  $R_{tot}$  also exhibits various degrees of ultrasensitivity depending on the value of  $k_4$ , *i.e.*, the  
281 stability of  $R_p$ . To dissect this mechanism leading to ultrasensitivity for  $R_{tot}$ , we use the following  
282 two steady-state flux and mass conservation equations to solve for  $R_{tot}$ :

283 
$$k_0 = k_3 R + k_4 R_p, \quad (5)$$

284 
$$R_{tot} = R + R_p. \quad (6)$$

285 By substituting either  $R$  or  $R_p$  from Eq. (5) in Eq. (6), we obtain two equations that exhibit  
286 symmetry with respect to  $k_3$  and  $k_4$ , namely

287 
$$R_{tot} = \frac{k_0}{k_3} + \left(1 - \frac{k_4}{k_3}\right) R_p, \quad (7)$$

288 
$$R_{tot} = \frac{k_0}{k_4} + \left(1 - \frac{k_3}{k_4}\right) R. \quad (8)$$

289 The equations say that except for cases where  $k_3$  and  $k_4$  are equal, the steady-state  $R_{tot}$  scales  
290 linearly with both  $R_p$  or  $R$ . When  $k_3 > k_4$ , *i.e.*, phosphorylation results in  $R_p$  stabilization,  $R_{tot}$  has a  
291 basal level determined by  $k_0/k_3$  and increases as  $R_p$  increases (Eq 7). For very small  $k_4$ ,  
292  $R_{tot} \approx k_0/k_3 + R_p$ . Since the response curve  $R_p$  vs.  $X$  is always monotonically increasing (Fig. 3B),  
293 its ultrasensitivity is passed to  $R_{tot}$  with comparable  $n_H$  values. By contrast, the LRC of the  $R_{tot}$   
294 response will be lower than that of the  $R_p$  response due to the presence of the basal level  $k_0/k_3$   
295 (Fig. 3E vs. 3F). Conversely, if phosphorylation results in  $R_p$  destabilization, *i.e.*,  $k_3 < k_4$ ,  $R_{tot}$  has  
296 a minimal level determined by  $k_0/k_4$  (Eq 8). For very large  $k_4$ ,  $R_{tot} \approx k_0/k_4 + R$ . Since the response  
297 curve of  $R$  vs.  $X$  is always monotonically decreasing (Fig. 3A), its ultrasensitivity is passed to  $R_{tot}$   
298 with comparable  $n_H$  values, and again, the  $|LRC|$  of the  $R_{tot}$  response is lower than that of the  $R$   
299 response, due to the presence of the minimal level  $k_0/k_4$  (Fig. 3D vs. 3F).

300

#### 301 **2.4 Effects on timing of signaling**

302 PTMs can have an effect on the timing of signaling. When they induce changes in protein  
303 stability, the time it takes the signaling motif to reach steady state in response to  $X$  is no longer  
304 determined only by the covalent modification reactions, but also by the half-lives of the protein  
305 substrate. Not surprisingly, for  $k_4$  lower than the default value, it takes much longer time for  $R$ ,  
306  $R_p$  and  $R_{tot}$  to reach their steady state (Fig. 3G-3I). The trajectory of  $R$  is nonmonotonic – it first  
307 decreases quickly as a result of the phosphorylation of pre-existing  $R$  and then rises slowly  
308 (because  $R_{tot}$  increases) to settle at a new steady state (Fig. 3G). In comparison,  $R_p$  first shoots  
309 up quickly as a result of the phosphorylation of pre-existing  $R$  into  $R_p$ , and then rises slowly  
310 toward its new steady state (Fig. 3H).  $R_{tot}$  does not exhibit a biphasic trend and instead  
311 increases gradually toward its new steady state (Fig. 3I). For  $k_4$  higher than the default value,  
312 the time it takes to reach the steady state does not appear to be monotonically correlated with  $k_4$   
313 (Fig. 3G-3I). For  $k_4$  values slightly higher than  $k_3$ , the differential stability of  $R$  and  $R_p$  causes the  
314 system to approach the steady state slowly because the protein half-life, rather than the fast MM  
315 reactions, dominates the long-term kinetics (Fig. 3G and 3H, purple vs. orange lines). But as  $k_4$   
316 increases further, the responses are overall faster since the overall protein half-life becomes  
317 shorter (Fig. 3G-3I, green vs purple lines). Generally,  $R$  first decreases quickly as a result of  
318 phosphorylation of pre-existing  $R$  and then continues to decrease till it settles to a new steady  
319 state (Fig. 3G). In comparison,  $R_p$  exhibits a nonmonotonic trajectory – it first rises quickly as a  
320 result of phosphorylation of pre-existing  $R$  into  $R_p$ , and then decreases (because  $R_{tot}$  decreases)  
321 slowly to settle at a new steady state (Fig. 3H).  $R_{tot}$  has a similar monotonically decreasing  
322 profile as  $R$  (Fig. 3I).

323

#### 324 **3. Protein stabilization can lead to the emergence of ultrasensitivity**

325 As we demonstrated for a CMC with pre-existing ultrasensitivity, stabilization of  $R_p$  can enhance

326 the degree of ultrasensitivity of the responses. In this section, we explore the possibility that  
327 stabilization of  $R_p$  can render a formerly non-ultrasensitive CMC ultrasensitive. To demonstrate  
328 this possibility, we first destroy ultrasensitivity by raising the default values of the Michaelis  
329 constants 10-fold, such that  $K_{m1}=K_{m2}=100$ . As a result, the cycle no longer exhibits  
330 ultrasensitivity for the former default value 0.01 of  $k_4$  (Figs. 4A-4C), as evaluated by  $|LRC|_{max}$   
331 (Figs. 4D-4F). Starting with this new baseline, we now let  $k_4$  decrease below 0.01, which causes  
332  $R_p$  to be more stable than  $R$ . Indeed, the responses, especially the steady-state DR curves for  
333  $R_p$  vs.  $X$  and  $R_{tot}$  vs.  $X$ , all begin to show a trend toward ultrasensitivity, as the total protein  
334 substrate level approaches and eventually surpasses the Michaelis constants  $K_{m1}$  and  $K_{m2}$ ,  
335 thereby pushing the phosphorylation and dephosphorylation cycle toward saturation (Figs. 4A-  
336 4C). These results demonstrate that ultrasensitivity can emerge *de novo* with PTM-induced  
337 protein stabilization.

338

#### 339 **4. Regulation of protein modification cycles through alterations in enzyme features**

340 Given the important role of enzyme saturation by the substrate in CMC-mediated ultrasensitivity,  
341 we explore in this section whether changes in the kinetic features of the modifying or  
342 demodifying enzymes can modulate the DR curves and their ultrasensitivity. Specifically, we  
343 investigate how changes in the Michaelis constants  $K_{m1}$  and  $K_{m2}$  modulate the steady-state DR  
344 curves and their ultrasensitivity. As a first example, we consider  $K_{m1}$  and examine the case  
345 where phosphorylation of  $R$  into  $R_p$  results in destabilization (as the baseline, we set  $k_4=0.1$ ,  
346 which is 10-fold greater than  $k_3$ ). As  $K_{m1}$  decreases, the DR curves for  $R$  and  $R_{tot}$  become  
347 increasingly more sigmoidal (Figs. 5A and 5C), with limited changes in the  $R_p$  responses (Fig.  
348 5B). For low  $K_{m1}$  values,  $|LRC|_{max}$  can be much greater than  $|n_H|$ , whereas for high  $K_{m1}$  values,  
349  $|n_H|$  approaches 1.12, and  $|LRC|_{max}$  approaches 1, indicating loss of ultrasensitivity (Figs. 5A  
350 and 5D). For the  $R_p$  response, increasing  $K_{m1}$  reduces the steepness of the DR curve with  $|n_H|$   
351 approaching 1.25, and ultrasensitivity is lost for high  $K_{m1}$  values as indicated by  $|LRC|$  below 1

352 (Figs. 5B and 5E). Lastly, increasing  $K_{m1}$  reduces the steepness of the DR curve for  $R_{tot}$  with  $|n_H|$   
353 approaching 1.25, and ultrasensitivity is lost for high  $K_{m1}$  values as is indicated by  $|LRC|$  below 1  
354 (Figs. 5C and 5F). Varying the Michaelis constant  $K_{m2}$  of the phosphatase has a similar effect on  
355 ultrasensitivity (Fig. S1).

356

357 The rationale for a second analysis is the situation where phosphorylation of  $R$  into  $R_p$   
358 results in strong protein stabilization ( $k_4=0.001$ , 10-fold lower than  $k_3$ ). When  $K_{m1}$  decreases  
359 below its baseline value of 10 in this situation, the DR curves for  $R$ ,  $R_p$  and  $R_{tot}$  become  
360 increasingly sigmoidal. For the response of  $R$ ,  $|n_H|$  obviously overestimates the degree of  
361 ultrasensitivity as evaluated by  $|LRC|_{max}$  (Fig. 6A and 6D). By contrast, for high  $K_{m1}$  values,  $|n_H|$   
362 approaches 1.93, and  $|LRC|_{max}$  approaches 1, indicating loss of true ultrasensitivity. For the  $R_p$   
363 response, increasing  $K_{m1}$  reduces the steepness of the DR curve with  $|n_H|$  approaching 2.61,  
364 and  $|LRC|_{max}$  is reduced to 4.97 with some, but not a complete loss of ultrasensitivity (Fig. 6B  
365 and 6E). Except for very high  $K_{m1}$  values,  $|LRC|_{max}$  is generally higher than  $|n_H|$ . The reason that  
366 large  $K_{m1}$  values do not result in complete loss of ultrasensitivity is that  $K_{m2}$  is still kept at default  
367 value of 10, thus keeping the dephosphorylation step close to saturable. Lastly, increasing  $K_{m1}$   
368 reduces the steepness of the DR curve for  $R_p$  with  $|n_H|$  approaching 2.61, while  $|LRC|_{max}$  is  
369 reduced to 2.34 with some loss of ultrasensitivity (Fig. 6C and 6F). Except for very low  $K_{m1}$   
370 values,  $|LRC|_{max}$  is generally higher than  $|n_H|$ . Varying  $K_{m2}$  has a similar effect on ultrasensitivity  
371 (Fig. S2).

372

373 In addition, we studied the effects of changing the catalytic constant  $k_2$  of the  
374 phosphatase reaction on ultrasensitivity. In a nutshell, changes in  $k_2$  do affect the degree of  
375 ultrasensitivity, but only quantitatively, not qualitatively (Figs. S3 and S4). Varying  $k_1$  merely  
376 shifts the DR curves horizontally without changing the degree of ultrasensitivity (simulation  
377 results not shown).



378

379 **5. Ultrasensitivity in response to changes in protein synthesis**

380 Lastly, we examine whether changes in the synthesis of  $R$  can lead to ultrasensitivity if PTM  
 381 induces changes in protein stability. Suppose the kinase  $X$  displays an intermediate activity level  
 382 of 1 and the rate of synthesis of  $R$ ,  $k_0$ , is varied. Interestingly, when  $R_p$  is destabilized, *i.e.*,  $k_4 >$   
 383  $k_3$ ,  $R$  and  $R_{tot}$  at steady-state exhibit ultrasensitive responses for a certain range of values of  $k_0$   
 384 even though their responses never plateau (Fig. 7A and 7C). By contrast, if  $k_0$  is gradually  
 385 increased,  $R_p$  initially increases linearly (in log space), then plateaus, not exhibiting  
 386 ultrasensitivity for any value of  $k_0$  (Fig. 7B). When  $k_3 = k_4$ ,  $R_{tot}$  is proportional to  $k_0$ , and  $R$  is  
 387 slightly ultrasensitive. For stabilization of  $R_p$ , and thus  $k_3 > k_4$ , the response of  $R$  vs  $k_0$  is linear,  
 388 while the response of  $R_{tot}$  vs.  $k_0$  exhibits slight subsensitivity, with  $LRC$  dipping below 1 for some  
 389 range of  $k_0$  (Fig. 7F).

390

391 The emergence of ultrasensitivity in the responses of  $R$  and  $R_{tot}$  for high  $k_4$  values may  
 392 be counterintuitive, since destabilization of  $R_p$  is believed to drive the enzymes away from  
 393 saturation. The reason for ultrasensitivity to occur is the saturation of the flux through the  
 394 phosphorylation ( $k_1$ ) step: when  $k_0$  approaches a high value like 10, any further small increase  
 395 only leads to an increase in  $R$ , but not  $R_p$ , and the result is ultrasensitivity. Actually, this  
 396 mechanism of ultrasensitivity is a variant of zero-order degradation, which no longer requires  
 397 the dephosphorylation reaction. By setting  $k_2 = 0$ , *i.e.*, disabling dephosphorylation,  
 398 ultrasensitivity in the  $R$  and  $R_{tot}$  responses remains strong (Fig. S5).

399

**Table 2. Summary of effects of parameters on ultrasensitivity**

| Parameter varied    | Parameter condition | Effects on $ LRC _{max}$ of DR |                    |                    |
|---------------------|---------------------|--------------------------------|--------------------|--------------------|
|                     |                     | $R$ vs. $X$                    | $R_p$ vs. $X$      | $R_{tot}$ vs. $X$  |
| $\downarrow k_4$    | $k_3 > k_4$         | $\uparrow\uparrow$             | $\uparrow\uparrow$ | $\uparrow\uparrow$ |
| $\uparrow k_4$      | $k_3 < k_4$         | $\downarrow$                   | $\downarrow$       | $\uparrow$         |
| $\downarrow K_{m1}$ | $k_3 > k_4$         | $\uparrow\uparrow$             | $\uparrow\uparrow$ | $\uparrow\uparrow$ |

|                     |             |                    |                    |                     |
|---------------------|-------------|--------------------|--------------------|---------------------|
| $\downarrow K_{m1}$ | $k_3 < k_4$ | $\uparrow\uparrow$ | $\uparrow$         | $\uparrow\uparrow$  |
| $\downarrow K_{m2}$ | $k_3 > k_4$ |                    |                    |                     |
| $\downarrow K_{m2}$ | $k_3 < k_4$ | $\uparrow\uparrow$ | $\uparrow$         | $\uparrow\uparrow$  |
| $\uparrow k_2$      | $k_3 > k_4$ | $\uparrow\uparrow$ | $\uparrow\uparrow$ | $\uparrow\uparrow$  |
| $\uparrow k_2$      | $k_3 < k_4$ | $\uparrow$         | $\uparrow$         | $\uparrow$          |
|                     |             | $R$ vs. $k_0$      | $R_p$ vs. $k_0$    | $R_{tot}$ vs. $k_0$ |
| $\downarrow k_4$    | $k_3 > k_4$ | $\downarrow$       | -                  | $\uparrow$          |
| $\uparrow k_4$      | $k_3 < k_4$ | $\uparrow\uparrow$ | -                  | $\uparrow\uparrow$  |

Note: For the effects on  $|LRC|_{max}$ ,  $\uparrow$  or  $\downarrow$  denotes small effects;  $\uparrow\uparrow$  or  $\downarrow\downarrow$  denotes large effects; - denotes no effect.

400

401

## Discussion

402 Cellular signal transduction pathways and gene regulatory networks regularly involve PTMs of  
403 protein components as a means to regulate their activities and abundance. Nearly all PTM  
404 reactions require participation of specific enzymes that add or remove particular functional  
405 groups to the appropriate protein substrates. When these enzymes operate near saturation with  
406 their substrates, nonlinear signaling may occur, where input signals are amplified to switch  
407 output signals on or off [16, 17]. When the protein substrates in a CMC are in excess relative to  
408 the modification or demodification enzymes, the degree of saturation of these enzymes depends  
409 on the Michaelis constants and the abundance of the contributing substrates.

410

411 The covalent modification status of a protein substrate may not only modulate its activity,  
412 but also alter its affinity as a substrate for the ubiquitination-proteasomal pathway that mediates  
413 the degradation of the majority of intracellular proteins [30]. Depending on whether the  
414 covalently modified protein molecule is a better or less suited substrate for ubiquitination, PTM  
415 can either stabilize or destabilize the protein and thereby regulate its abundance. For instance,  
416 under normoxia, HIF-1 $\alpha$  is oxidized by prolyl hydroxylase domain-containing proteins (PHD) in  
417 an oxygen-dependent manner and thereby targeted by the pVHL ubiquitination pathway for  
418 degradation, thus keeping the hypoxic transcriptional program under control [29, 31]. As a  
419 different example, phosphorylation of p53 by ATM during the DNA damage response leads to its  
420 stabilization [1]. Therefore, the overall protein half-life and abundance do not remain constant in  
421 these situations, rather, they can change dynamically depending on the covalently modified  
422 fraction of the protein molecules. The altered protein substrate abundance in turn affects the  
423 degree of enzyme saturation, and hence creates an important nonlinearity in signaling.

424

425 An obvious scenario of this type is PTM-induced protein stabilization on top of zero-order  
426 ultrasensitivity that pre-exists even for basal abundances of the protein substrates. In this

427 scenario, as our simulation demonstrated, the degree of ultrasensitivity for the phosphorylated  
428 protein response ( $R_p$ ) with respect to the kinase  $X$  is considerably elevated, with  $LRC$  and the  
429 Hill coefficient increasing sharply as the half-life of  $R_p$  is prolonged (Fig. 3B and 3E). The  
430 enhancement of ultrasensitivity is due to the concurrently increased total protein substrate  
431 abundance as the input signal  $X$  increases, which pushes the kinase and phosphatase further  
432 into a saturated mode of operation. When the protein substrate is not high enough to enable  
433 zero-order ultrasensitivity at the basal condition, the increased protein substrate abundance  
434 induced by PTM can move the signaling motif toward saturation, thereby causing the  
435 emergence of ultrasensitivity, as demonstrated in Fig. 4B and 4E. During the process of PTM-  
436 induced protein stabilization, the unmodified protein response is also enhanced for  
437 ultrasensitivity (Fig. 3A, 3D) or rendered ultrasensitive (Fig. 4A and 4D) although the response  
438 of  $R$  vs.  $X$  follows an inhibitory profile where  $R$  decreases as the input signal  $X$  increases.

439

440 An unexpected finding is the total protein response to the input signal ( $R_{tot}$  vs.  $X$ ), which  
441 can also exhibit ultrasensitivity, for both cases of PTM-induced protein stabilization and  
442 destabilization (Fig. 3C and 4C). The original Goldbeter-Koshland model was intended to  
443 examine either the covalently modified or unmodified protein responses under the condition of  
444 zero-order ultrasensitivity, while the total protein abundance stayed constant. Here, our  
445 simulations show that ultrasensitivity can emerge when there is an imbalance in the stability of  
446 the modified and unmodified proteins. When the modified protein is more stable, the total  
447 protein response resembles the modified protein response with a non-zero basal level. When  
448 modified protein is less stable, the total protein response resembles the unmodified protein  
449 response. In both situations, the response of  $R_{tot}$  vs.  $X$  can be ultrasensitive. As an example, in  
450 the drosophila embryo, MAPK can phosphorylate transcriptional repressor Yan in response to  
451 morphogen gradients and thereby induce its degradation; this inducible degradation of Yan was  
452 proposed as part of a zero-order ultrasensitivity mechanism for the switch-like Yan response

453 responsible for the patterning of the embryonic ventral ectoderm [19]. Therefore, protein activity  
454 changes by PTM in a CMC are not mandatory for achieving zero-order ultrasensitivity if protein  
455 stability is also regulated by PTM. In the present study, we also demonstrate that if the input-  
456 driving signal is supposed to increase the production rate of the protein substrate, a saturable  
457 covalent modification reaction, coupled with decreased stability of the modified protein, can also  
458 lead to an ultrasensitive increase in either the unmodified or total protein levels (Fig. 7A and  
459 7C).

460

461 In the absence of PTM-induced changes in protein stability, the CMC motif can launch a  
462 quick response amenable to the time scale associated with covalent modification reactions  
463 catalyzed by enzymes. However, when protein stability is altered by PTM with half-lives at the  
464 order of hours, it can take much longer for this signaling motif to reach steady state (Fig. 3G-3I).  
465 If the protein substrate or its downstream target is a transcription factor, such as p53, HIF-1,  
466 BCL-6 or Yan, a relatively slow rise or activation may not matter much as far as the timeliness of  
467 a response is concerned, because the ensuing transcriptional induction of downstream genes  
468 take much more time to complete anyway. Importantly, we propose here that ultrasensitivity  
469 through protein stabilization can be a potential energy-saving strategy employed by cells, where  
470 maintaining a high, saturating level of the protein substrate at basal condition may no longer be  
471 necessary. In addition, the initial overshoot exhibited by the  $R$  or  $R_p$  response as shown in Fig.  
472 3G and 3I can also be a signaling strategy utilized by cells to accelerate transcriptional induction  
473 for gene production with long half-lives [32].

474

475 Throughout the result section and the Supplemental Materials, we have compared the  
476 degree of steepness of the steady-state DR curve as quantified by  $n_H$  with the degree of true  
477 ultrasensitivity quantified by  $LRC$  and confirmed their known differences in describing  
478 ultrasensitive DR curves [12, 27]. While the two metrics in most situations move in the same

479 direction in response to changes in a parameter value, the corresponding  $|n_H|$  for a particular  
480 DR curve can be higher or lower than  $|LRC|_{max}$ . A higher  $|n_H|$  value means an overestimate of  
481 the degree of amplification of the DR curve, which often occurs when the DR curve has a  
482 significant basal level (Fig. 4C and 5C). There are also scenarios where the DR curve exhibits a  
483 profile comprising of an almost linear response followed immediately by a plateau (Fig. 7B and  
484 S3B). Such a response profile may have an apparent  $n_H=2$  despite the fact that its response is  
485 at most linear. We have also encountered DR curves having an  $|LRC|_{max}$  value higher than  $|n_H|$   
486 (Fig. S4B and S4C); in these situations,  $n_H$  underestimates the degree of amplification.

487

488 Also building upon Goldbeter and Koshland's concepts, Mallela *et al.* proposed  
489 mathematical models for protein modification cycles, focusing, in particular, on protein  
490 substrates that are ubiquitinated by the same E3 ligases, which mark both proteins for  
491 degradation [25]. Apparently, many E3 ligases are promiscuous, thereby permitting competition  
492 between "similar" protein substrates. The authors observed that the sensitivity to incoming  
493 signals, as well as the ultrasensitivity of the response, is diminished or even destroyed when the  
494 protein substrate saturates the modifying enzyme. This ultrasensitivity-weakening effect is more  
495 dramatic if the cycling proteins are degraded at a relatively high rate, consistent with our earlier  
496 findings [24]. They also found that signaling cycles, in which the coupling of protein substrates  
497 collectively leads to saturation of the enzymes, can lead to a coupled, switch-like response in all  
498 protein substrates, likely due to the competition or "crosstalk" of the substrate proteins with  
499 respect to the same E3 ligases.

500

501 The signaling motif of a CMC can exhibit complex dynamic behaviors and has been  
502 extensively studied computationally. Wang *et al.* investigated and decomposed the tunability of  
503 the zero-order ultrasensitivity [33]. Xu and Gunawardena examined some more realistic  
504 intracellular situations where multiple enzyme intermediates exist due to co-substrate binding for

505 both reversible and irreversible reactions and found that these complications modulate the zero-  
506 order switching behavior [34]. The operation of the CMC in the face of protein expression noise  
507 has been explored recently [35, 36]. It seems important to have correlated expression of the  
508 paired modification and demodification enzymes to prevent switch flipping, and bifunctional  
509 enzymes in a CMC may be an ideal solution in this regard [36]. Using linear reactions of the  
510 modification and demodification reactions, Soyer demonstrated that the CMC motif, like  
511 negative feedback or incoherent feedforward loops, can exhibit transient or persistent dynamic  
512 responses depending on the difference in protein stability [37]. As we have demonstrated in the  
513 present study (summarized in Table 2), considering PTM-associated changes in protein  
514 stability, enzyme features, or protein synthesis can add yet another level of sophistication to the  
515 complex response behavior of this long-studied signaling motif.

516

517

### **Acknowledgements**

518 The work was supported by NIEHS Superfund Research grant P42ES04911 and NIEHS

519 HERCULES grant P30ES019776.

520



521

## References

- 522 1 Stommel, J. M., Wahl, G. M. 2004 Accelerated MDM2 auto-degradation induced by DNA-  
523 damage kinases is required for p53 activation. *EMBO J.* **23**, 1547-1556.  
524 (10.1038/sj.emboj.7600145)
- 525 2 Shieh, S. Y., Ikeda, M., Taya, Y., Prives, C. 1997 DNA damage-induced phosphorylation of  
526 p53 alleviates inhibition by MDM2. *Cell.* **91**, 325-334. (10.1016/s0092-8674(00)80416-x)
- 527 3 Niu, H., Ye, B. H., Dalla-Favera, R. 1998 Antigen receptor signaling induces MAP kinase-  
528 mediated phosphorylation and degradation of the BCL-6 transcription factor. *Genes Dev.* **12**,  
529 1953-1961. (10.1101/gad.12.13.1953)
- 530 4 Goto, H., Natsume, T., Kanemaki, M. T., Kaito, A., Wang, S., Gabazza, E. C., Inagaki, M.,  
531 Mizoguchi, A. 2019 Chk1-mediated Cdc25A degradation as a critical mechanism for normal cell  
532 cycle progression. *J Cell Sci.* **132**, (10.1242/jcs.223123)
- 533 5 Kanarek, N., Ben-Neriah, Y. 2012 Regulation of NF-kappaB by ubiquitination and degradation  
534 of the IkappaBs. *Immunol Rev.* **246**, 77-94. (10.1111/j.1600-065X.2012.01098.x)
- 535 6 Ulery, P. G., Rudenko, G., Nestler, E. J. 2006 Regulation of DeltaFosB stability by  
536 phosphorylation. *J Neurosci.* **26**, 5131-5142. (10.1523/JNEUROSCI.4970-05.2006)
- 537 7 Goldbeter, A., Koshland, D. E., Jr. 1982 Sensitivity amplification in biochemical systems. *Q*  
538 *Rev Biophys.* **15**, 555-591. (10.1017/s0033583500003449)
- 539 8 Kholodenko, B. N., Hoek, J. B., Westerhoff, H. V., Brown, G. C. 1997 Quantification of  
540 information transfer via cellular signal transduction pathways. *FEBS Lett.* **414**, 430-434.  
541 (10.1016/s0014-5793(97)01018-1)
- 542 9 Koshland, D. E., Jr., Goldbeter, A., Stock, J. B. 1982 Amplification and adaptation in  
543 regulatory and sensory systems. *Science.* **217**, 220-225. (10.1126/science.7089556)
- 544 10 Ferrell, J. E., Jr. 1996 Tripping the switch fantastic: how a protein kinase cascade can  
545 convert graded inputs into switch-like outputs. *Trends Biochem Sci.* **21**, 460-466.  
546 (10.1016/s0968-0004(96)20026-x)
- 547 11 Ferrell, J. E., Jr., Ha, S. H. 2014 Ultrasensitivity part III: cascades, bistable switches, and  
548 oscillators. *Trends Biochem Sci.* **39**, 612-618. (10.1016/j.tibs.2014.10.002)
- 549 12 Zhang, Q., Bhattacharya, S., Andersen, M. E. 2013 Ultrasensitive response motifs: basic  
550 amplifiers in molecular signalling networks. *Open Biol.* **3**, 130031. (10.1098/rsob.130031)
- 551 13 Ferrell, J. E., Jr., Ha, S. H. 2014 Ultrasensitivity part I: Michaelian responses and zero-order  
552 ultrasensitivity. *Trends Biochem Sci.* **39**, 496-503. (10.1016/j.tibs.2014.08.003)
- 553 14 Ferrell, J. E., Jr., Ha, S. H. 2014 Ultrasensitivity part II: multisite phosphorylation,  
554 stoichiometric inhibitors, and positive feedback. *Trends Biochem Sci.* **39**, 556-569.  
555 (10.1016/j.tibs.2014.09.003)

- 556 15 Uy, R., Wold, F. 1977 Posttranslational covalent modification of proteins. *Science*. **198**, 890-  
557 896. (10.1126/science.337487)
- 558 16 Goldbeter, A., Koshland, D. E., Jr. 1981 An amplified sensitivity arising from covalent  
559 modification in biological systems. *Proc Natl Acad Sci U S A*. **78**, 6840-6844.  
560 (10.1073/pnas.78.11.6840)
- 561 17 Goldbeter, A., Koshland, D. E., Jr. 1984 Ultrasensitivity in biochemical systems controlled by  
562 covalent modification. Interplay between zero-order and multistep effects. *J Biol Chem*. **259**,  
563 14441-14447.
- 564 18 Cimino, A., Hervagault, J. F. 1987 Experimental evidence for a zero-order ultrasensitivity in a  
565 simple substrate cycle. *Biochem Biophys Res Commun*. **149**, 615-620. (10.1016/0006-  
566 291x(87)90412-8)
- 567 19 Melen, G. J., Levy, S., Barkai, N., Shilo, B. Z. 2005 Threshold responses to morphogen  
568 gradients by zero-order ultrasensitivity. *Mol Syst Biol*. **1**, 2005 0028. (10.1038/msb4100036)
- 569 20 Huang, C. Y., Ferrell, J. E., Jr. 1996 Ultrasensitivity in the mitogen-activated protein kinase  
570 cascade. *Proc Natl Acad Sci U S A*. **93**, 10078-10083. (10.1073/pnas.93.19.10078)
- 571 21 Meinke, M. H., Edstrom, R. D. 1991 Muscle glycogenolysis. Regulation of the cyclic  
572 interconversion of phosphorylase a and phosphorylase b. *J Biol Chem*. **266**, 2259-2266.
- 573 22 Meinke, M. H., Bishop, J. S., Edstrom, R. D. 1986 Zero-order ultrasensitivity in the regulation  
574 of glycogen phosphorylase. *Proc Natl Acad Sci U S A*. **83**, 2865-2868.  
575 (10.1073/pnas.83.9.2865)
- 576 23 LaPorte, D. C., Koshland, D. E., Jr. 1983 Phosphorylation of isocitrate dehydrogenase as a  
577 demonstration of enhanced sensitivity in covalent regulation. *Nature*. **305**, 286-290.  
578 (10.1038/305286a0)
- 579 24 Zhang, Q., Bhattacharya, S., Conolly, R. B., Andersen, M. E. Year Nonlinearities in Cellular  
580 Dose-Response Behaviors Can Be Enhanced by Protein Stabilization. Society of Toxicology  
581 54th Annual Meeting; 2015 March 22-26, 2015; San Diego, CA; 2015. p. Abstract #719.
- 582 25 Mallela, A., Nariya, M. K., Deeds, E. J. 2020 Crosstalk and ultrasensitivity in protein  
583 degradation pathways. *PLoS Comput Biol*. **16**, e1008492. (10.1371/journal.pcbi.1008492)
- 584 26 Legewie, S., Bluthgen, N., Herzel, H. 2005 Quantitative analysis of ultrasensitive responses.  
585 *FEBS J*. **272**, 4071-4079. (10.1111/j.1742-4658.2005.04818.x)
- 586 27 Altszyler, E., Ventura, A. C., Colman-Lerner, A., Chernomoretz, A. 2017 Ultrasensitivity in  
587 signaling cascades revisited: Linking local and global ultrasensitivity estimations. *PLoS One*. **12**,  
588 e0180083. (10.1371/journal.pone.0180083)
- 589 28 Breitschopf, K., Haendeler, J., Malchow, P., Zeiher, A. M., Dimmeler, S. 2000  
590 Posttranslational modification of Bcl-2 facilitates its proteasome-dependent degradation:  
591 molecular characterization of the involved signaling pathway. *Mol Cell Biol*. **20**, 1886-1896.  
592 (10.1128/mcb.20.5.1886-1896.2000)

- 593 29 Huang, L. E., Gu, J., Schau, M., Bunn, H. F. 1998 Regulation of hypoxia-inducible factor  
594 1 $\alpha$  is mediated by an O<sub>2</sub>-dependent degradation domain via the ubiquitin-proteasome  
595 pathway. *Proc Natl Acad Sci U S A.* **95**, 7987-7992. (10.1073/pnas.95.14.7987)
- 596 30 Glickman, M. H., Ciechanover, A. 2002 The ubiquitin-proteasome proteolytic pathway:  
597 destruction for the sake of construction. *Physiol Rev.* **82**, 373-428.  
598 (10.1152/physrev.00027.2001)
- 599 31 Maxwell, P. H., Wiesener, M. S., Chang, G. W., Clifford, S. C., Vaux, E. C., Cockman, M. E.,  
600 Wykoff, C. C., Pugh, C. W., Maher, E. R., Ratcliffe, P. J. 1999 The tumour suppressor protein  
601 VHL targets hypoxia-inducible factors for oxygen-dependent proteolysis. *Nature.* **399**, 271-275.  
602 (10.1038/20459)
- 603 32 Zeisel, A., Kostler, W. J., Molotski, N., Tsai, J. M., Krauthgamer, R., Jacob-Hirsch, J.,  
604 Rechavi, G., Soen, Y., Jung, S., Yarden, Y., *et al.* 2011 Coupled pre-mRNA and mRNA  
605 dynamics unveil operational strategies underlying transcriptional responses to stimuli. *Mol Syst*  
606 *Biol.* **7**, 529. (10.1038/msb.2011.62)
- 607 33 Wang, G., Zhang, M. 2016 Tunable ultrasensitivity: functional decoupling and biological  
608 insights. *Sci Rep.* **6**, 20345. (10.1038/srep20345)
- 609 34 Xu, Y., Gunawardena, J. 2012 Realistic enzymology for post-translational modification: zero-  
610 order ultrasensitivity revisited. *J Theor Biol.* **311**, 139-152. (10.1016/j.jtbi.2012.07.012)
- 611 35 Jithinraj, P. K., Roy, U., Gopalakrishnan, M. 2014 Zero-order ultrasensitivity: a study of  
612 criticality and fluctuations under the total quasi-steady state approximation in the linear noise  
613 regime. *J Theor Biol.* **344**, 1-11. (10.1016/j.jtbi.2013.11.014)
- 614 36 Dasgupta, T., Croll, D. H., Owen, J. A., Vander Heiden, M. G., Locasale, J. W., Alon, U.,  
615 Cantley, L. C., Gunawardena, J. 2014 A fundamental trade-off in covalent switching and its  
616 circumvention by enzyme bifunctionality in glucose homeostasis. *J Biol Chem.* **289**, 13010-  
617 13025. (10.1074/jbc.M113.546515)
- 618 37 Soyer, O. S., Kuwahara, H., Csikasz-Nagy, A. 2009 Regulating the total level of a signaling  
619 protein can vary its dynamics in a range from switch like ultrasensitivity to adaptive responses.  
620 *FEBS J.* **276**, 3290-3298. (10.1111/j.1742-4658.2009.07054.x)  
621  
622

623 **Figure Legend**

624 **Figure 1. Schematic illustration of covalent protein modification cycles (CMCs) that**

625 **respond to altered protein stability.** (A) p53 stabilization by ATM-catalyzed phosphorylation.

626 (B) BCL6 destabilization by ERK-catalyzed phosphorylation. (C) Generic signaling motif based

627 on phosphorylation-dephosphorylation, used here as the baseline for modeling ( $Y$ , the

628 phosphatase driving dephosphorylation of  $R_p$ , is not shown). Open arrow heads: mass flux;

629 thick arrows: fluxes with high degradation rates, dashed arrows: enzymatic catalysis.

630

631 **Figure 2. Steady-state DR curves of  $R$  and  $R_p$ , associated fluxes,  $n_H$  and  $LCR$ , as**

632 **functions of kinase activity  $X$ .** (A) DR curves of  $R$  vs.  $X$  and  $R_p$  vs.  $X$  on linear scale. (B)

633 Fluxes, named by associated rate constant, and plotted against  $X$ . Specifically, phosphorylation

634 flux:  $k_1$ ; dephosphorylation flux:  $k_2$ ; degradation flux of  $R$ :  $k_3$ ; and degradation flux of  $R_p$ :  $k_4$ . (C)

635 DR curves of  $R$  vs.  $X$  and  $R_p$  vs.  $X$  on double-log scale. (D)  $n_H$  and  $LRC$  of DR curves of  $R$  vs.  $X$

636 and  $R_p$  vs.  $X$ .

637

638 **Figure 3. Effects of  $k_4$  on ultrasensitivity and response time.** (A-C) Steady-state DR curves

639 for  $R$  vs.  $X$ ,  $R_p$  vs.  $X$ , and  $R_{tot}$  vs.  $X$ , respectively, for different values of  $k_4$ , as indicated in panel

640 (A). The color scheme for  $k_4$  in panel (A) is the same for all panels. (D-F)  $LRC$  (solid lines) and

641  $n_H$  (dashed horizontal lines) pertain to  $R$ ,  $R_p$ , and  $R_{tot}$ , respectively. (G-I) Response of  $R$ ,  $R_p$ , and

642  $R_{tot}$  over time, induced by  $X=1$ , respectively. \*  $k_4=0.01$  is the default value.

643

644 **Figure 4. Emergence of ultrasensitivity through phosphorylation-induced protein**

645 **stabilization.** (A-C) Steady-state DR curves for  $R$  vs.  $X$ ,  $R_p$  vs.  $X$ , and  $R_{tot}$  vs.  $X$ , respectively,

646 for different values of  $k_4$ , as indicated in panel A. The same color-scheme for  $k_4$  values holds for

647 all panels. As  $k_4$  decreases, ultrasensitivity emerges for  $R_p$  and  $R_{tot}$ . (D-F)  $LRC$  (solid lines) and

648  $n_H$  (dashed horizontal lines) for  $R$ ,  $R_p$ , and  $R_{tot}$ , respectively, for different values of  $k_4$ . \*  $k_4=0.01$

649 is the default value. For these experiments, the Michaelis constants were set to  $K_{m1}=K_{m2}=100$ .

650

651 **Figure 5. Effects of  $K_{m1}$  on ultrasensitivity under phosphorylation-induced protein**  
652 **destabilization ( $k_4 = 0.1$ ).** (A-C) Steady-state DR curves for  $R$  vs.  $X$ ,  $R_p$  vs.  $X$ , and  $R_{tot}$  vs.  $X$ ,  
653 respectively, for different values of  $K_{m1}$ , as indicated in A. The same color scheme for  $K_{m1}$   
654 values holds for all panels. The degree of ultrasensitivity increases for decreasing values of  $K_{m1}$ .  
655 (D-F) LRC (solid lines) and  $n_H$  (dashed horizontal lines) for  $R$ ,  $R_p$ , and  $R_{tot}$ , respectively. \*  
656  $K_{m1}=10$  is the default value.

657

658 **Figure 6. Effects of  $K_{m1}$  on ultrasensitivity under phosphorylation-induced protein**  
659 **stabilization ( $k_4 = 0.001$ ).** In contrast to Figure 5, the results here pertain to a  $k_4$  that is ten-fold  
660 lower than the default. (A-C) Steady-state DR curves for  $R$  vs.  $X$ ,  $R_p$  vs.  $X$ , and  $R_{tot}$  vs.  $X$ ,  
661 respectively, for different values of  $K_{m1}$ , as indicated in A. The same color-scheme for  $K_{m1}$   
662 values holds for all panels. (D-F) LRC (solid lines) and  $n_H$  (dashed horizontal lines) for  $R$ ,  $R_p$ ,  
663 and  $R_{tot}$ , respectively. \*  $K_{m1}=10$  is the default value.

664

665 **Figure 7.  $k_0$ -driven ultrasensitivity with phosphorylation-induced changes in protein**  
666 **stability.** (A-C) Steady-state DR curves for  $R$  vs.  $k_0$ ,  $R_p$  vs.  $k_0$ , and  $R_{tot}$  vs.  $k_0$ , respectively, for  
667 different values of  $k_4$  indicated in (A). The same color-scheme for  $k_4$  values is used for the other  
668 panels. (D-F) LRC (solid lines) and  $n_H$  (dashed horizontal lines) for  $R$ ,  $R_p$ , and  $R_{tot}$ . \*  $k_4=0.01$  is  
669 the default value.  $X=1$  for all conditions. Note that no  $n_H$  was evaluated for  $R$  and  $R_{tot}$  because  
670 the responses do not saturate.

671

# Figure 1

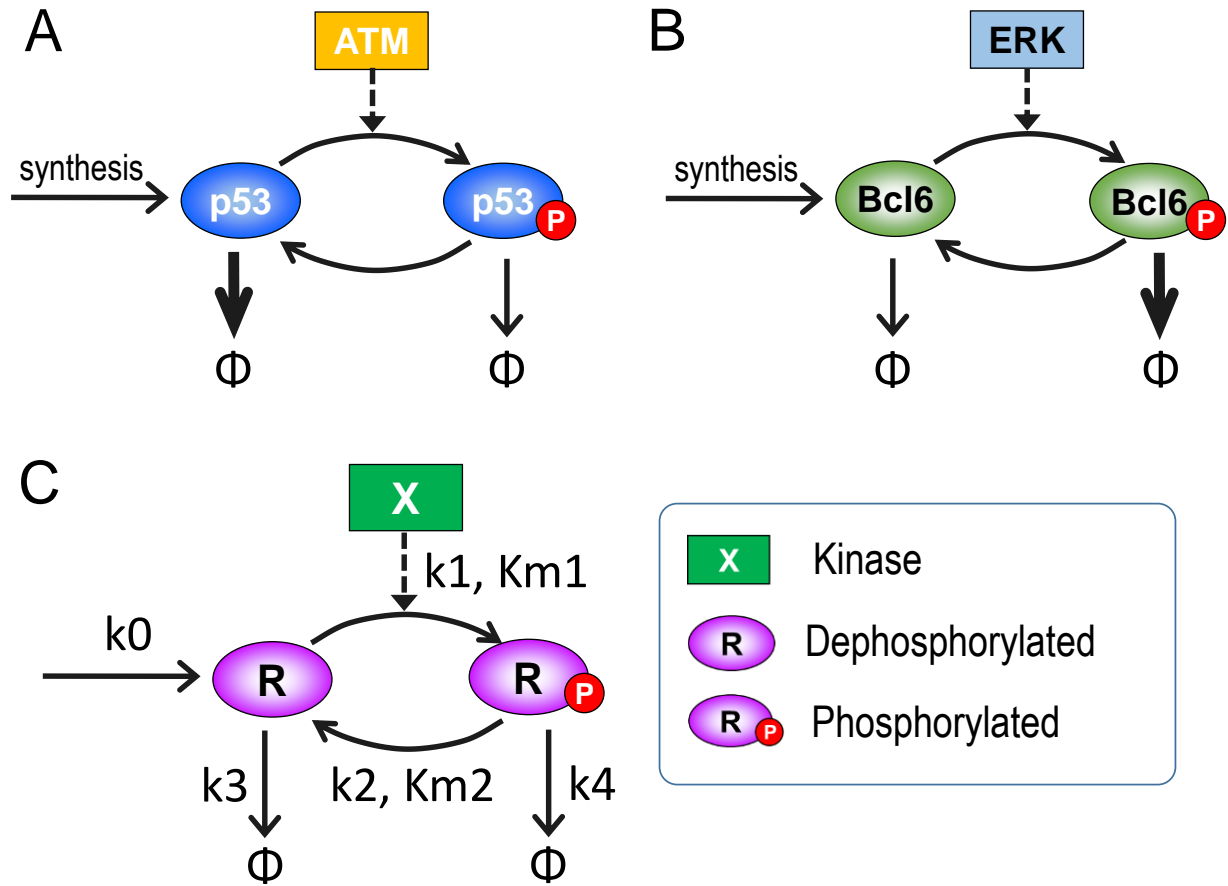

## Figure 2

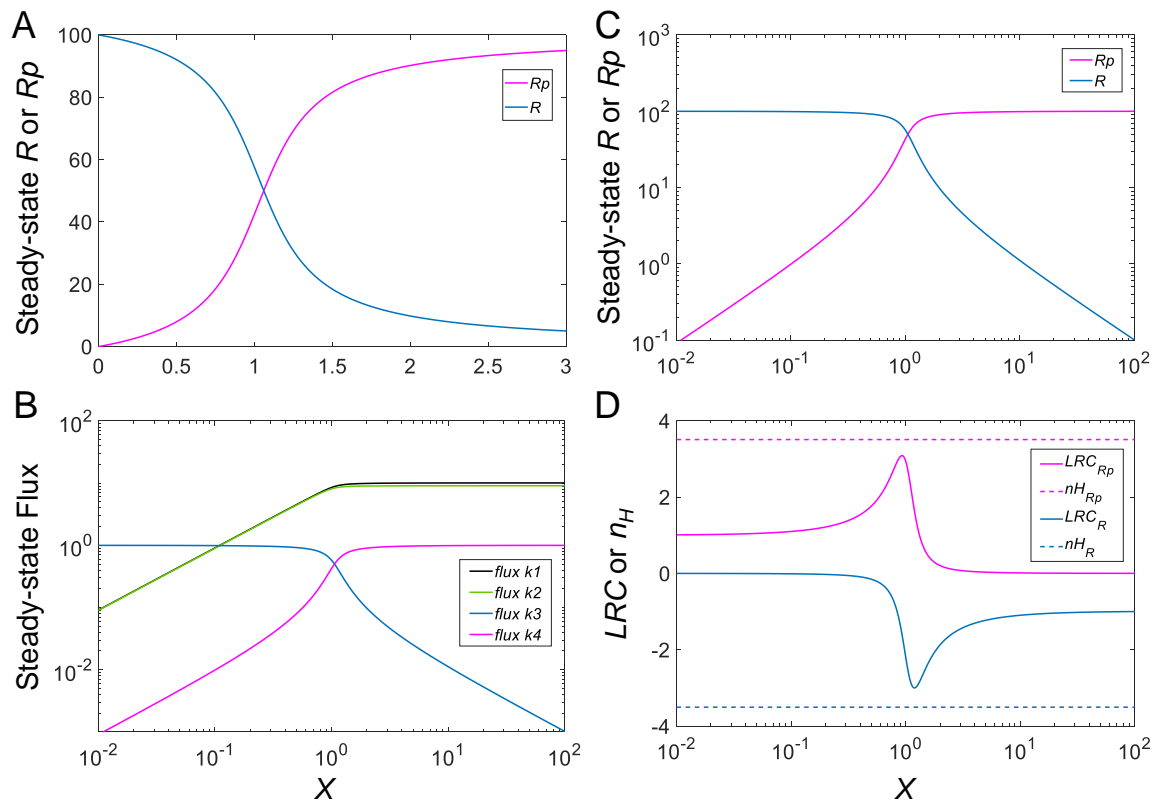

## Figure 3

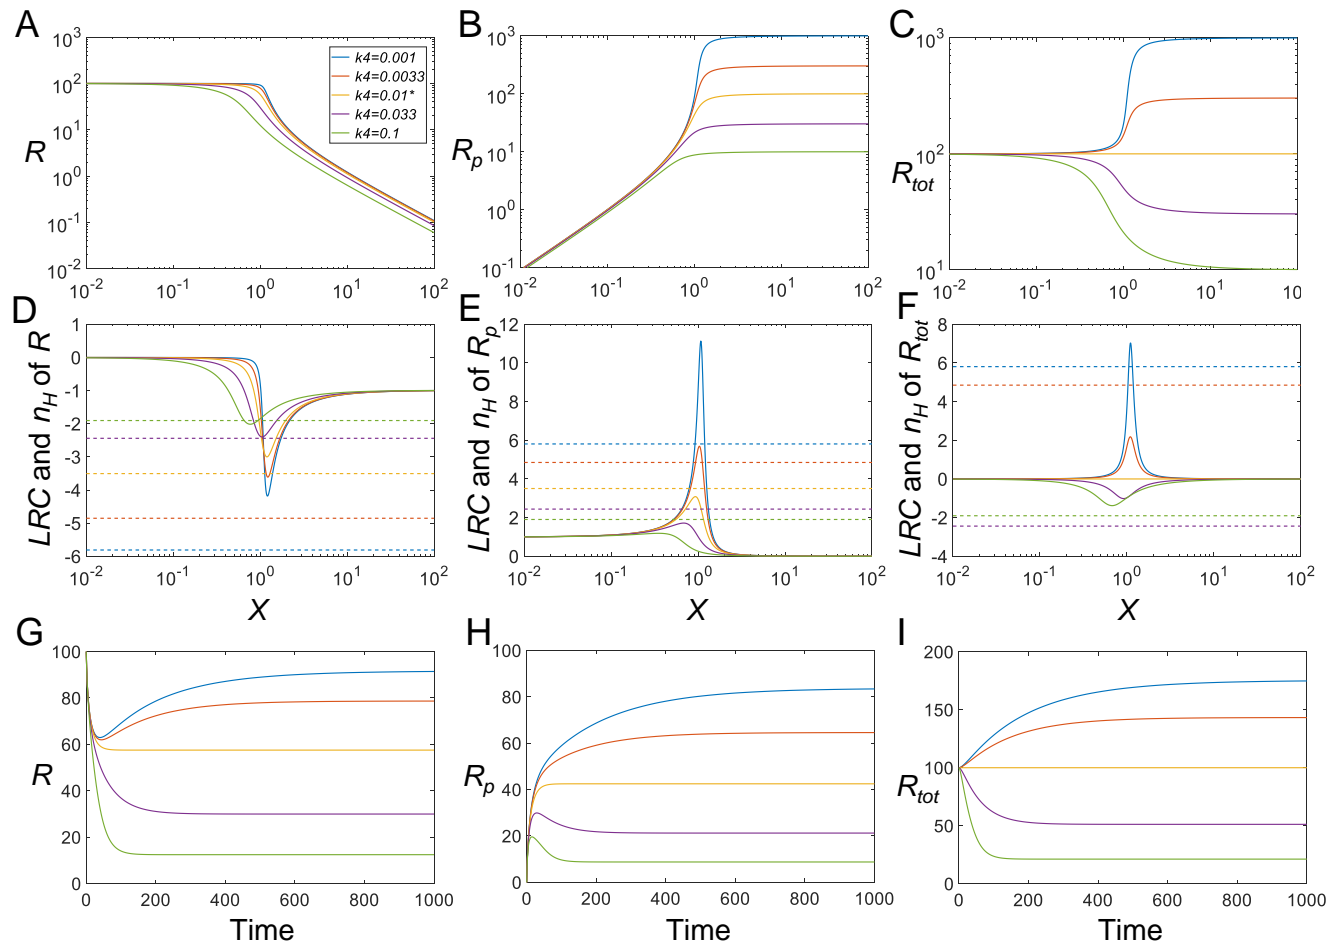



## Figure 4

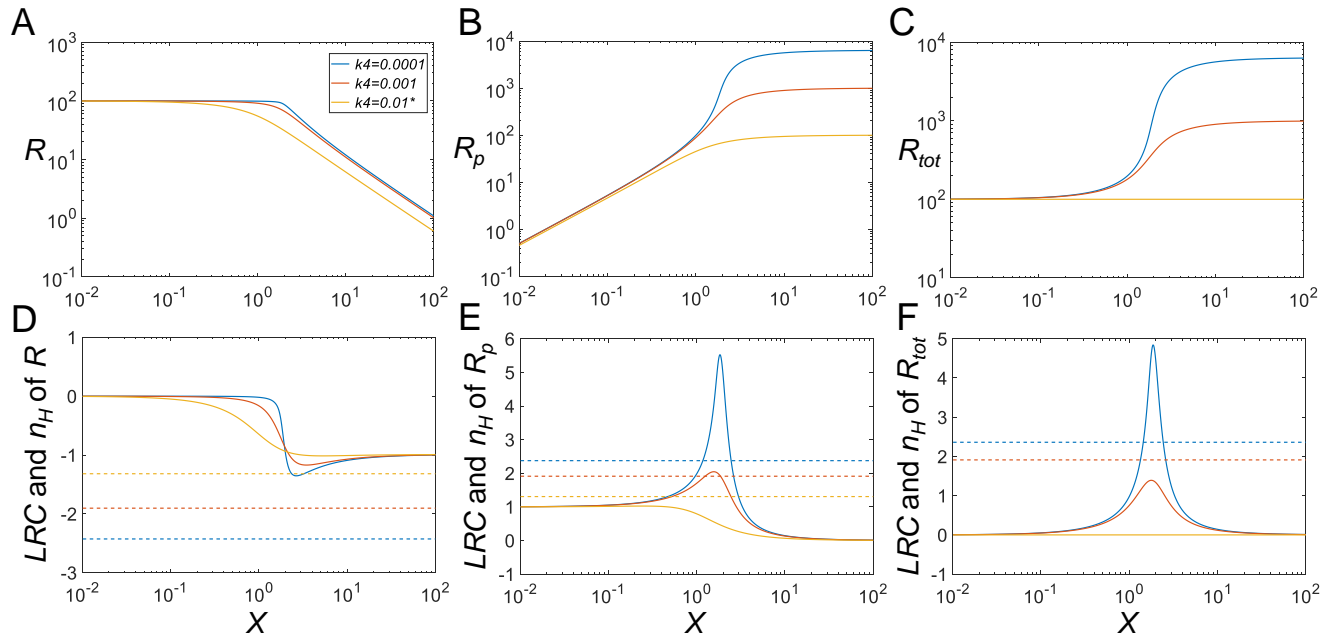

## Figure 5

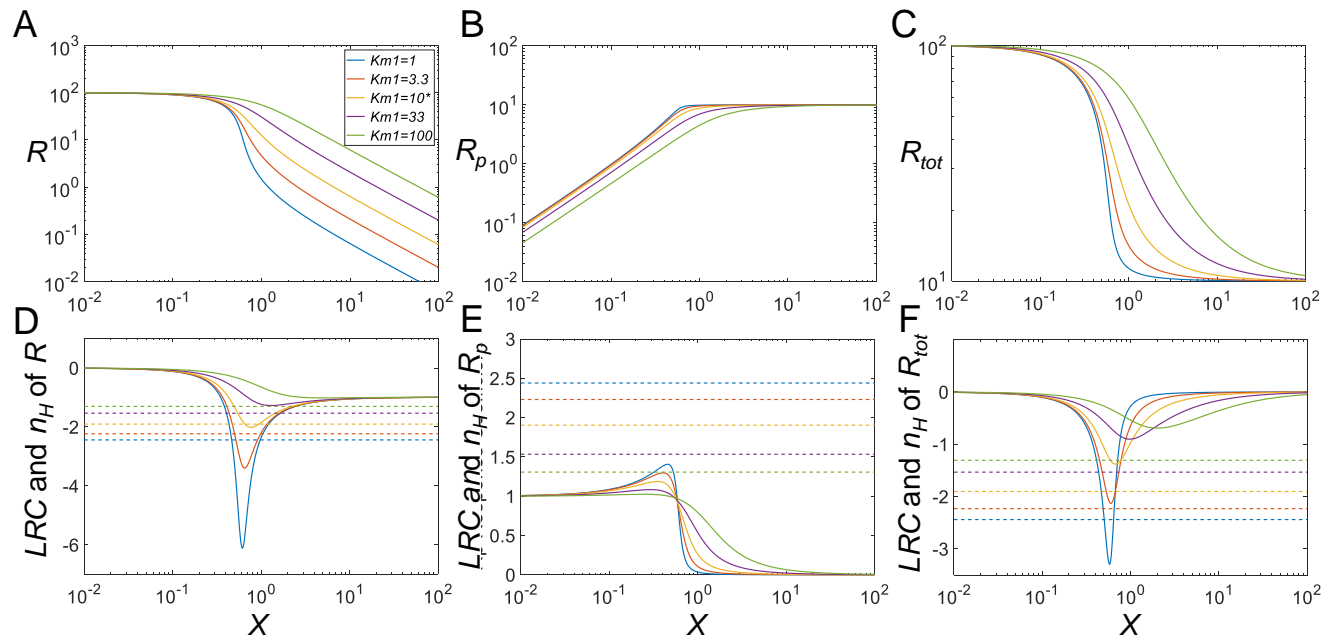

## Figure 6

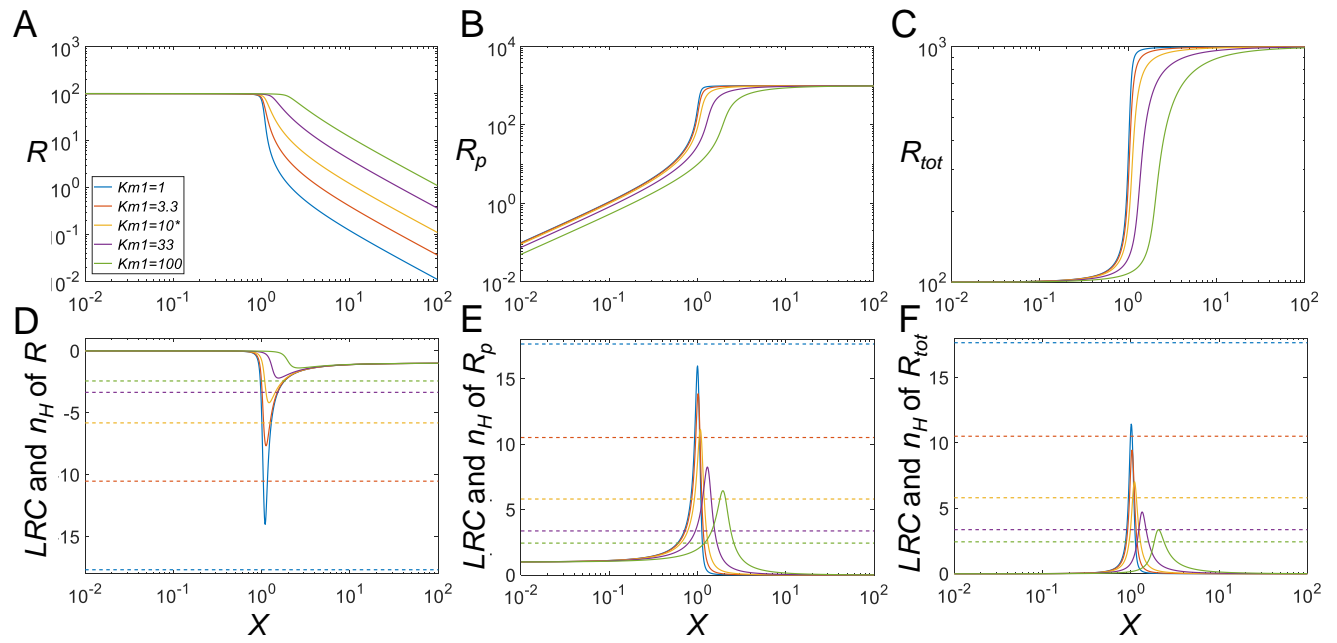

## Figure 7

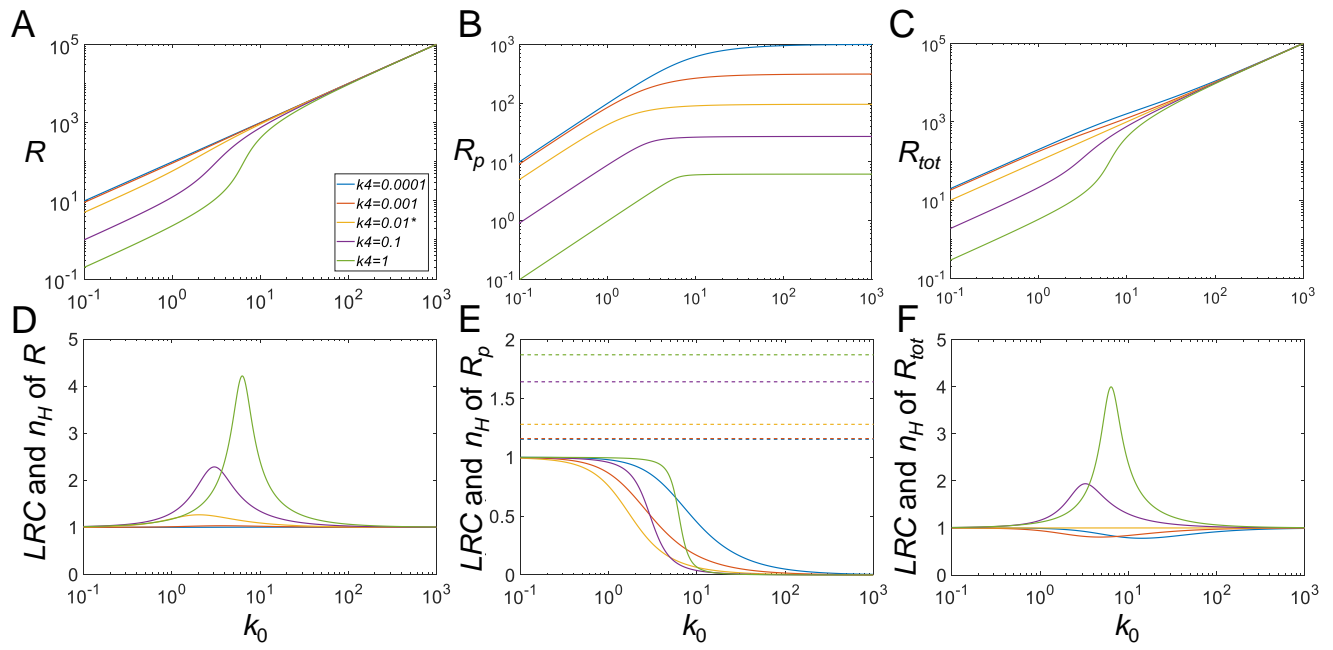

Source: https://www.biorxiv.org/content/10.1101/2021.08.22.457287v1.full.pdf
